# Supplementary material for: Cervical and thoracolumbar transspinal stimulation at 0.3 Hz and 30 Hz facilitates neuronal excitability in healthy humans: A randomized cross-over study
Source: Research Square preprint supplement (doi:10.21203/rs.3.rs-7364288/v1), 2025-09-01
Supplement: Supplementary file 1 [file be7d09ee98ce51451619f6c0.docx]

| **0.3 Hz multisite transspinal stimulation** | | | | | | | | | | | | | | |
| --- | --- | --- | --- | --- | --- | --- | --- | --- | --- | --- | --- | --- | --- | --- |
|  | **R TA MEPs** | | | | | | | **L TA MEPs** | | | | | | |
| R2 | Max | m | slope | S-th | S-50 | S-Max | R2 | Max | m | slope | S-th | S-50 | S-Max |
| Before | 0.78±0.06 | **9.43±5.49** | 0.16±0.1 | 16.4±7.18 | 39.83±8.01 | 56.23±11.69 | 72.63±17.67 | 0.82±0.07 | 12.2±7.8 | 0.19±0.16 | 15.39±7.94 | **45.64±2.44** | 61.04±5.98 | 76.43±13.84 |
| After | 0.76±0.09 | **7.77±3.33** | 0.14±0.05 | 16.32±8.03 | 42.17±5.86 | 58.49±7.06 | 74.8±13.93 | 0.86±0.08 | 13.49±6.11 | 0.13±0.04 | 16.67±6.79 | **52.22±9.28** | 68.88±12.8 | 85.55±18.26 |
|  | **R SOL MEPs** | | | | | | | **R VL MEPs** | | | | | | |
| R2 | Max | m | slope | S-th | S-50 | S-Max | R2 | Max | m | slope | S-th | S-50 | S-Max |
| Before | 0.77±0.05 | 1.63±0.34 | 0.18±0.07 | 12.5±3.42 | 37.25±5.40 | 49.75±7.69 | 62.25±10.61 | 0.87±0.08 | **9.05±5.65** | 0.3±0.39 | 15.26±11.67 | 45.25±6.24 | 60.51±9.09 | 75.77±19.97 |
| After | 0.84±0.09 | 1.61±0.46 | 0.16±0.07 | 13.83±4.66 | 41.39±5.71 | 55.22±7.13 | 69.06±10.61 | 0.89±0.12 | **11.98±10.17** | 0.22±0.11 | 10.86±4.91 | 47.85±5.43 | 58.71±5.83 | 69.58±9.31 |
|  | **R FCR MEPs** | | | | | | | **R ECR MEPs** | | | | | | |
| R2 | Max | m | slope | S-th | S-50 | S-Max | R2 | Max | m | slope | S-th | S-50 | S-Max |
| Before | 0.72±0.09 | **4.48±3.36** | 0.18±0.12 | 14.91±6.46 | **44.72±8.16** | 59.63±13.41 | 74.53±19.4 | 0.77±0.09 | 3.59±1.34 | 0.12±0.04 | 18.07±6.03 | **35.14±4.65** | 53.21±8.64 | 71.28±14.15 |
| after | 0.84±0.08 | **7.87±3.51** | 0.16±0.1 | 15.81±7.52 | **52.13±5.4** | 67.94±7.64 | 83.74±14.17 | 0.8±0.1 | 3.23±1.38 | 0.17±0.08 | 15.64±8.82 | **41.59±7.64** | 57.23±7.83 | 72.87±14.83 |
| **30 Hz multisite transspinal stimulation** | | | | | | | | | | | | | | |
|  | **R TA MEPs** | | | | | | | **L TA MEPs** | | | | | | |
| R2 | Max | m | slope | S-th | S-50 | S-Max | R2 | Max | m | slope | S-th | S-50 | S-Max |
| Before | 0.7±0.15 | **7.09±2.47** | 0.16±0.12 | 17.78±9.78 | 41.48±10.75 | 59.26±9.10 | 77.04±15.53 | 0.77±0.09 | **8.84±5.32** | 0.28±0.23 | **11.5±8.82** | 46.03±11.98 | 57.54±13.09 | 69.04±18.84 |
| After | 0.72±0.14 | **8.69±4.28** | 0.13±0.06 | 18.79±8.75 | 40.32±11.02 | 59.11±7.98 | 77.89±12.62 | 0.79±0.12 | **11.6±5.83** | 0.16±0.09 | **16.26±9.22** | 46.85±9.22 | 63.11±15.85 | 79.38±23.03 |
|  | **R SOL MEPs** | | | | | | | **R VL MEPs** | | | | | | |
| R2 | Max | m | slope | S-th | S-50 | S-Max | R2 | Max | m | slope | S-th | S-50 | S-Max |
| Before | 0.78±0.11 | 1.55±0.73 | **0.54±0.53** | 11.56±10.7 | 36.22±11.42 | 47.77±14.28 | 59.33±22.5 | 0.82±0.07 | **4.95±7.3** | 0.34±0.36 | 11.73±8.37 | 43.94±8.61 | 55.66±14.21 | 67.39±21.67 |
| After | 0.7±0.24 | 1.63±0.51 | **0.23±0.12** | 11.59±6.94 | 36.79±12.77 | 48.38±11.99 | 59.97±14.85 | 0.78±0.08 | **7.19±9.7** | 0.23±0.17 | 12.55±6.73 | 42.38±10.7 | 54.93±15.28 | 67.48±21.05 |
|  | **R FCRMEPs** | | | | | | | **R ECR MEPs** | | | | | | |
| R2 | Max | m | slope | S-th | S-50 | S-Max | R2 | Max | m | slope | S-th | S-50 | S-Max |
| Before | 0.75±0.11 | **6.61±4.10** | 0.23±0.11 | **10.22±5.07** | 44.8±5.68 | 54.62±7.89 | 65.03±11.78 | 0.72±0.18 | 10.8±16.21 | 0.16±0.09 | 19.16±13.85 | 46.46±12.70 | 65.62±20.69 | 84.78±22.84 |
| After | 0.75±0.11 | **9.81±8.7** | 0.27±0.23 | **17.88±17.97** | 46.6±8.8 | 61.02±17.43 | 75.43±28.42 | 0.76±0.09 | 6.91±4.03 | 0.19±0.20 | 17.62±9.98 | 41.34±7.28 | 58.96±10.89 | 76.58±19.59 |
| **Soleus H-reflex** | | | | | | | | | | | | | | |
|  | **0.3 Hz multisite transspinal stimulation** | | | | | | | **30 Hz multisite transspinal stimulation** | | | | | | |
| R2 | Max | m | slope | S-th | S-50 | S-Max | R2 | Max | m | slope | S-th | S-50 | S-Max |
| Before | 0.92±0.05 | 45.28±20.12 | 1.81±0.82 | 1.26±0.41 | 9.74±4.19 | 11.0±4.23 | 12.26±4.31 | 0.92±0.05 | 41.42±18.07 | 1.54±0.92 | 1.7±0.82 | 10.98±5.73 | 12.68±6.3 | 14.37±6.92 |
| After | 0.92±0.04 | 44.49±22.91 | 1.69±0.51 | 1.32±0.51 | 8.95±4.19 | 10.26±4.51 | 11.58±4.85 | 0.89±0.06 | 40.24±18.58 | 2.05±1.55 | 1.48±0.81 | 9.77±5.20 | 11.24±5.8 | 12.72±6.45 |

**Table 1. Sigmoid function predicted parameters for MEPs and soleus H-reflex**

Sigmoid function parameters were estimated from the sigmoid input–output relation of motor evoked potentials (MEPs) and soleus H-reflexes recorded on the ascending portion of the recruitment curve conducted for each subject separately and grouped based on subject group and time. m: slope parameter of the function, S-th: Stimulus at threshold, S-50: Stimulus at 50 % of maximal amplitude, S-Max: Stimulus at maximal amplitude. Mean ± SD. Bold values indicate cases of statistically significant differences after training compared to those observed before training based on a paired *t* test.
